# Supplementary material for: Association of individual and area-level socioeconomic conditions with quality of life and glycaemic control in 11- to 21-year-old adolescents with early-onset type 1 diabetes: a cross-sectional study
Source: Springer Nature journal article supplement (doi:10.1007/s11136-018-1949-6), 2018-08-11
Supplement: MOESM1 [file 16028306]

**ESM-Table 1: Association between covariates and quality of life scores or HbA1c (% or mmol/mol) (dependent variables): results of multiple linear mixed regression analyses**

| **Covariate** | | **KINDL-R (N=791)** | | **DISABKIDS** | | | | | | **HbA1c (N=763)** | | |
| --- | --- | --- | --- | --- | --- | --- | --- | --- | --- | --- | --- | --- |
|  | | **DCGM-12 (N=799)** | | **DM impact (N=794)** | | **DM treatment (N=793)** | | **(%)** | **(mmol/mol)** |  |
| β (95% CI) | p value | β (95% CI) | p value | β (95% CI) | p value | β (95% CI) | p value | β (95% CI) | β (95% CI) | p value |
| **Age** | per 1 year | -0.068 | 0.850 | 0.464 | 0.327 | 0.989 | 0.092 | -0.303 | 0.716 | 0.073 | 0.796 | 0.082 |
|  | increase | (-0.772; 0.636) |  | (-0.464; 1.393) |  | (-0.162; 2.141) |  | (-1.939; 1.333) |  | (-0.009; 0.155) | (-0.102; 1.694) |  |
| **Diabetes duration** | per 1 year | 0.003 | 0.993 | -0.287 | 0.600 | -0.089 | 0.895 | 0.191 | 0.843 | -0.033 | -0.365 | 0.493 |
|  | increase | (-0.809; 0.816) |  | (-1.359; 0.786) |  | (-1.418; 1.240) |  | (-1.694; 2.076) |  | (-0.129; 0.062) | (-1.408; 0.679) |  |
| **Sex** | female vs. male | -2.963 | <0.001 | -0.266 | 0.815 | -1.573 | 0.263 | -0.969 | 0.628 | 0.045 | 0.491 | 0.655 |
|  |  | (-4.649; -1.277) |  | (-2.496; 1.964) |  | (-4.324; 1.179) |  | (-4.889; 2.952) |  | (-0.152; 0.242) | (-1.664; 2.646) |  |
| **Not living with both** | yes vs. no | -0.962 | 0.341 | -1.318 | 0.321 | -1.657 | 0.316 | -0.378 | 0.872 | 0.226 | 2.474 | 0.060 |
| **biological parents** |  | (-2.944; 1.020) |  | (-3.926; 1.289) |  | (-4.901; 1.588) |  | (-4.975; 4.219) |  | (-0.009; 0.462) | (-0.100; 5.048) |  |
| **Migration** | yes vs. no | -3.919 | 0.162 | -3.173 | 0.395 | -5.553 | 0.225 | -8.580 | 0.190 | 0.207 | 2.266 | 0.527 |
| **background** |  | (-9.422; 1.583) |  | (-10.495; 4.148) |  | (-14.529; 3.423) |  | (-21.422; 4.262) |  | (-0.436; 0.850) | (-4.763; 9.294) |  |
| **Degree of** | Cities | -0.834 | 0.519 | 1.397 | 0.402 | 1.089 | 0.609 | 1.213 | 0.660 | -0.077 | -0.812 | 0.630 |
| **urbanization** | vs. rural areas | (-3.380; 1.714) |  | (-1.894; 4.687) |  | (-3.103; 5.281) |  | (-4.205; 6.632) |  | (-0.383; 0.238) | (-4.255; 2.631) |  |
|  | Towns/suburbs | 0.993 | 0.342 | 2.106 | 0.125 | 2.076 | 0.225 | 4.007 | 0.096 | -0.082 | -0.876 | 0.509 |
|  | vs. rural areas | (-1.059; 3.046) |  | (-0.583; 4.795) |  | (-1.281; 5.434) |  | (-0.711; 8.725) |  | (-0.327; 0.162) | (-3.543; 1.792) |  |
| **Overweight / Adiposity** | yes vs. no | -2.398 | 0.029 | -3.314 | 0.022 | -6.731 | <0.001 | -3.756 | 0.139 | 0.012 | 0.129 | 0.927 |
|  |  | (-4.553; -0.243) |  | (-6.144; -0.484) |  | (-10.247; -3.215) |  | (-8.728; 1.216) |  | (-0.243; 0.266) | (-2.652; 2.910) |  |
| **Insulin treatment** | CT vs. pump | -0.313 | 0.847 | -3.950 | 0.066 | -3.519 | 0.188 | -9.211 | 0.015 | 0.157 | 1.720 | 0.428 |
|  |  | (-3.495; 2.869 |  | (-8.163; 0.263) |  | (-8.758; 1.722) |  | (-16.652; -1.769) |  | (-0.232; 0.547) | (-2.537; 5.979) |  |
|  | ICT vs. pump | 0.842 | 0.337 | -2.753 | 0.017 | -4.403 | 0.002 | -2.376 | 0.242 | -0.167 | -1.826 | 0.104 |
|  |  | (-0.877; 2.562) |  | (-5.018; -0.488) |  | (-7.216; -1.591) |  | (-6.357; 1.605) |  | (-0.369; 0.3035 | (-4.030; 0.378) |  |
| **Severe hypoglycaemia** | 1 vs. 0 | -1.896 | 0.053 | -1.442 | 0.264 | -2.439 | 0.127 | -3.396 | 0.135 | 0.121 | 1.321 | 0.294 |
| **past 12 months** |  | (-3.818; 0.026) |  | (-3.973; 1.089) |  | (-5.574; 0.696) |  | (-7.851; 1.058) |  | (-0.105; 0.347) | (-1.146; 3.788) |  |
|  | ≥2 vs. 0 | -3.484 | 0.001 | -5.071 | <0.001 | -5.077 | 0.004 | -7.144 | 0.004 | 0.207 | 2.267 | 0.098 |
|  |  | (-5.586; -1.381) |  | (-7.845; -2.297) |  | (-8.517; -1.637) |  | (-12.029; -2.259) |  | (-0.039; 0.454) | (-0.422; 4.956) |  |
| **Hospitalization** **due to any** | yes vs. no | -2.778 | 0.004 | -5.105 | <0.001 | -5.085 | 0.001 | -4.028 | 0.075 | 0.746 | 8.151 | <0.001 |
| **cause (including diabetes) past 12 months** |  | (-4.682; -0.873) |  | (-7.626; -2.584) |  | (-8.201; -1.970) |  | (-8.464; 0.407) |  | (0.521; 0.971) | (5.694; 10.607) |  |
| **VPC** |  | 0.078 |  | 0.036 |  | 0.097 |  | <0.001 |  | 0.163 | |  |

For each outcome, estimates [regression coefficient β, 95% confidence interval (CI), p value] are derived from a linear mixed regression model (Model 0) adjusting for sex, age, diabetes duration, family structure, migration background, degree of urbanization, insulin therapy regimen, weight status, hospitalizations due to any cause (including diabetes) during the past 12 months, and severe hypoglycaemic events during the past 12 months, and including a random intercept related to municipalities. CT: conventional treatment with 1-3 injection time points; ICT: intensified conventional treatment with ≥4 injection time points; VPC: variance partition coefficient related to municipalities

## ESM-Table 2: Association between individual-level socioeconomic status and area-level deprivation and quality of life scores or HbA1c (% or mmol/mol) (dependent variables) by sex, age group or degree of urbanization: results of multiple linear mixed regression analyses

| **Model** | **SES indicator** | **Covariate** | **KINDL-R (N=791)** | | **DISABKIDS** | | | | | | **HbA1c (N=763)** | | |
| --- | --- | --- | --- | --- | --- | --- | --- | --- | --- | --- | --- | --- | --- |
|  |  |  |  | | **DCGM-12 (N=799)** | | **DM impact (N=794)** | | **DM treatment (N=793)** | | **%** | **mmol/mol** |  |
|  |  |  | β (95% CI) | p value | β (95% CI) | p value | β (95% CI) | p value | β (95% CI) | p value | β (95% CI) | β (95% CI) | p value |
| **Model 1** | **Individual socio-economic status** | **Sex** |  |  |  |  |  |  |  |  |  |  |  |
| Male | 0.130 | 0.354 | 0.551 | 0.003 | 0.365 | 0.112 | 0.258 | 0.430 | -0.027 | -0.290 | 0.114 |
| (-0.146; 0.406) |  | (0.187; 0.915) |  | (-0.086; 0.815) |  | (-0.382; 0.897) |  | (-0.059; 0.007) | (-0.649; 0.070) |  |
| Female | 0.438 | 0.002 | 0.487 | 0.012 | 0.692 | 0.003 | 0.660 | 0.047 | -0.024 | -0.263 | 0.151 |
| (0.155; 0.721) |  | (0.106; 0.851) |  | (0.230; 1.154) |  | (0.009; 1.312) |  | (-0.057; 0.009) | (-0.622; 0.096) |  |
|  |  |  | 0.120* |  | 0.781* |  | 0.310* |  | 0.378* |  |  | 0.915* |
| **German Index of Multiple Deprivation 2010** | Male | 0.071 | 0.322 | 0.022 | 0.819 | -0.090 | 0.439 | 0.182 | 0.265 | -0.005 | -0.053 | 0.574 |
| (-0.070; 0.212) |  | (-0.163; 0.206) |  | (-0.320; 0.139) |  | (-0.139; 0.504) |  | (-0.022; 0.012) | (-0.237; 0.132) |  |
| Female | 0.083 | 0.228 | -0.070 | 0.431 | -0.084 | 0.447 | 0.024 | 0.879 | 0.008 | 0.093 | 0.295 |
| (-0.052; 0.217) |  | (-0.244; 0.104) |  | (-0.302; 0.133) |  | (-0.280; 0.328) |  | (-0.007; 0.024) | (-0.081; 0.267) |  |
|  |  |  | 0.903* |  | 0.464* |  | 0.970* |  | 0.471* |  |  | 0.240* |
| **VPC** |  | 0.081 |  | 0.035 |  | 0.095 |  | 0.000 |  | 0.159 | |  |
| **Model 2** | **Individual socio-economic status** | **Age group** |  |  |  |  |  |  |  |  |  |  |  |
| 11-13 years | 0.484 | 0.039 | 0.726 | 0.021 | 0.668 | 0.084 | 0.894 | 0.105 | -0.045 | -0.496 | 0.094 |
| (0.024; 0.943) |  | (0.081; 1.178) |  | (-0.090; 1.427) |  | (-0.168; 1.974) |  | (-0.098; 0.008) | (-1.076; 0.084) |  |
| 14-17 years | 0.207 | 0.121 | 0.398 | 0.024 | 0.305 | 0.163 | -0.106 | 0.730 | 0.002 | -0.023 | 0.893 |
| (-0.055; 0.468) |  | (0.051; 0.745) |  | (-0.124; 0.734) |  | (-0.711; 0.499) |  | (-0.028; -0.032) | (-0.309; 0.355) |  |
| 18-21years | 0.414 | 0.038 | 0.653 | 0.013 | 0.910 | 0.005 | 1.464 | 0.001 | -0.088 | -0.964 | <0.001 |
| (0.023; 0.802) |  | (0.141; 1.165) |  | (0.279; 1.540) |  | (0.577; 2.351) |  | (-0.134; -0.042) | (-1.468; -0.461) |  |
|  |  |  | 0.480* |  | 0.550* |  | 0.265* |  | 0.010* |  |  | 0.004* |
| **German Index of Multiple Deprivation 2010** | 11-13 years | 0.098 | 0.370 | -0.106 | 0.465 | -0.294 | 0.103 | 0.012 | 0.961 | 0.008 | 0.087 | 0.532 |
| (-0.116; 0.312) |  | (-0.392; 0.179) |  | (-0.647; -0.059) |  | (-0.489; 0.514) |  | (-0.017; 0.033) | (-0.185; 0.358) |  |
| 14-17 years | 0.028 | 0.676 | -0.022 | 0.800 | -0.089 | 0.410 | 0.150 | 0.315 | 0.004 | 0.045 | 0.598 |
| (-0.103; 0.159) |  | (-0.191; 0.147) |  | (-0.301; 0.123) |  | (-0.143; 0.443) |  | (-0.011; 0.020) | (-0.123; 0.213) |  |
| 18-21 years | 0.171 | 0.076 | 0.018 | 0.885 | 0.057 | 0.717 | 0.009 | 0.967 | -0.007 | -0.071 | 0.576 |
| (-0.018; 0.360) |  | (-0.230; 0.267) |  | (-0.252; 0.366) |  | (-0.423; 0.441) |  | (-0.029; 0.016) | (-0.320; 0.178) |  |
|  |  |  | 0.439* |  | 0.803* |  | 0.330* |  | 0.817* |  |  | 0.649* |
| **VPC** |  | 0.091 |  | 0.030 |  | 0.102 |  | <0.001 |  | 0.178 | |  |

## ESM-Table 2: *(continued)*

| **Model 3** | **Individual socio-economic status** | **Urbanization** |  |  |  |  |  |  |  |  |  |  |  |
| --- | --- | --- | --- | --- | --- | --- | --- | --- | --- | --- | --- | --- | --- |
| Cities | 0.237 | 0.172 | 0.499 | 0.030 | 0.457 | 0.105 | 0.329 | 0.412 | -0.047 | -0.515 | 0.021 |
| (-0.103; 0.578) |  | (0.048; 0.950) |  | (-0.096; 1.009) |  | (-0.456; 1.113) |  | (-0.087; -0.007) | (-0.951; -0.079) |  |
| Towns/suburbs | 0.332 | 0.027 | 0.541 | 0.006 | 0.357 | 0.145 | 0.415 | 0.233 | -0.015 | -0.167 | 0.381 |
| (0.038; 0.626) |  | (0.154; 0.928) |  | (-0.123; 0.837) |  | (-0.268; 1.097) |  | (-0.050; 0.0219 | (-0.541; 0.207) |  |
| Rural areas | 0.217 | 0.307 | 0.472 | 0.091 | 0.938 | 0.007 | 0.709 | 0.149 | -0.012 | -0.134 | 0.630 |
| (-0.200; 0.633) |  | (-0.076; 1.019) |  | (0.258; 1.618) |  | (-0.255; 1.673) |  | (-0.062; 0.038) | (-0.682; 0.413) |  |
|  |  |  | 0.869* |  | 0.977* |  | 0.370* |  | 0.824* |  |  | 0.408* |
| **German Index of Multiple Deprivation 2010** | Cities | -0.025 | 0.853 | -0.239 | 0.171 | 0.015 | 0.949 | 0.003 | 0.993 | -0.003 | -0.035 | 0.855 |
| (-0.298; 0.247) |  | (-0.587; 0.109) |  | (-0.437; 0.466) |  | (-0.552; 0.557) |  | (-0.038; 0.032) | (-0.417; 0.347) |  |
| Towns/suburbs | 0.044 | 0.541 | -0.014 | 0.878 | -0.184 | 0.120 | 0.098 | 0.553 | 0.004 | 0.045 | 0.628 |
| (-0.097; 0.185) |  | (-0.198; 0.170) |  | (-0.415; 0.048) |  | (-0.226; 0.422) |  | (-0.013; 0.021) | (-0.137; 0.227) |  |
| Rural areas | 0.174 | 0.047 | 0.049 | 0.659 | 0.003 | 0.981 | 0.151 | 0.438 | 0.003 | 0.032 | 0.781 |
| (0.003; 0.345) |  | (-0.169; 0.266) |  | (-0.267; 0.274) |  | (-0.232; 0.534) |  | (-0.018; 0.023) | (-0.192; 0.255) |  |
|  |  |  | 0.368* |  | 0.368* |  | 0.524* |  | 0.910* |  |  | 0.932* |
| **VPC** |  | 0.088 |  | 0.021 |  | 0.103 |  | <0.001 |  | 0.180 | |  |

For each outcome, estimates [regression coefficient β, 95% confidence interval (CI), p value] are from a linear mixed regression models adjusting for sex, age group, diabetes duration, family structure, migration background, degree of urbanization, insulin therapy regimen, weight status, hospitalisations due to any cause (including diabetes) during the past 12 months, severe hypoglycaemic events during the past 12 months, and including a district related random intercept. The first model (Model 1) additionally included interaction terms SES by sex and GIMD by sex, the second model (Model 2) interactions terms SES by age and GIMD by age, and the third model (Model 3) interaction terms SES by degree of urbanization and GIMD by urbanization.

VPC: variance partition coefficient related to municipalities; *: p value of test for no interaction between SES indicator and covariate (equivalently: p value of test for no difference in association of SES indicator with outcome in covariate strata)
